# Supplementary material for: Engineered macrophage-derived exosomes via click chemistry for the treatment of osteomyelitis
Source: Royal Society of Chemistry journal article supplement (doi:10.1039/d4tb01346h), 2024-01-01
Supplement: d4tb01346h1.pdf [file d4tb01346h1.pdf]

## **Engineered Macrophages-Derived Exosomes by Click Chemistry for Treatment of osteomyelitis**

Yongfeng Chen,<sup>#a,b</sup> Jintao Dong,<sup>#b</sup> Jiahan Li,<sup>#a,c</sup> Jun Li,<sup>a</sup> Yizhao Lu,<sup>a</sup> Wengang  
Dong,<sup>\*a</sup> Dawei Zhang and <sup>\*b</sup> Xingbo Dang <sup>\*a</sup>

<sup>a</sup>Department of emergency surgery, Shaanxi Provincial People's Hospital, Xi'an, 710068, China.

<sup>b</sup>Department of Orthopedics, Xijing Hospital, The Fourth Military Medical University, Xi'an, 710032, China.

<sup>c</sup>Department of clinical medicine, Xi'an Medical University, Xi'an, 710021, China.

Corresponding author. Email: [dongwengang2024@yeah.net](mailto:dongwengang2024@yeah.net) (W. D);

[zhangdw@fmmu.edu.cn](mailto:zhangdw@fmmu.edu.cn) (D. Z); [dangxb2006@126.com](mailto:dangxb2006@126.com) (X. D)

<sup>#</sup> These authors contributed equally to this work.

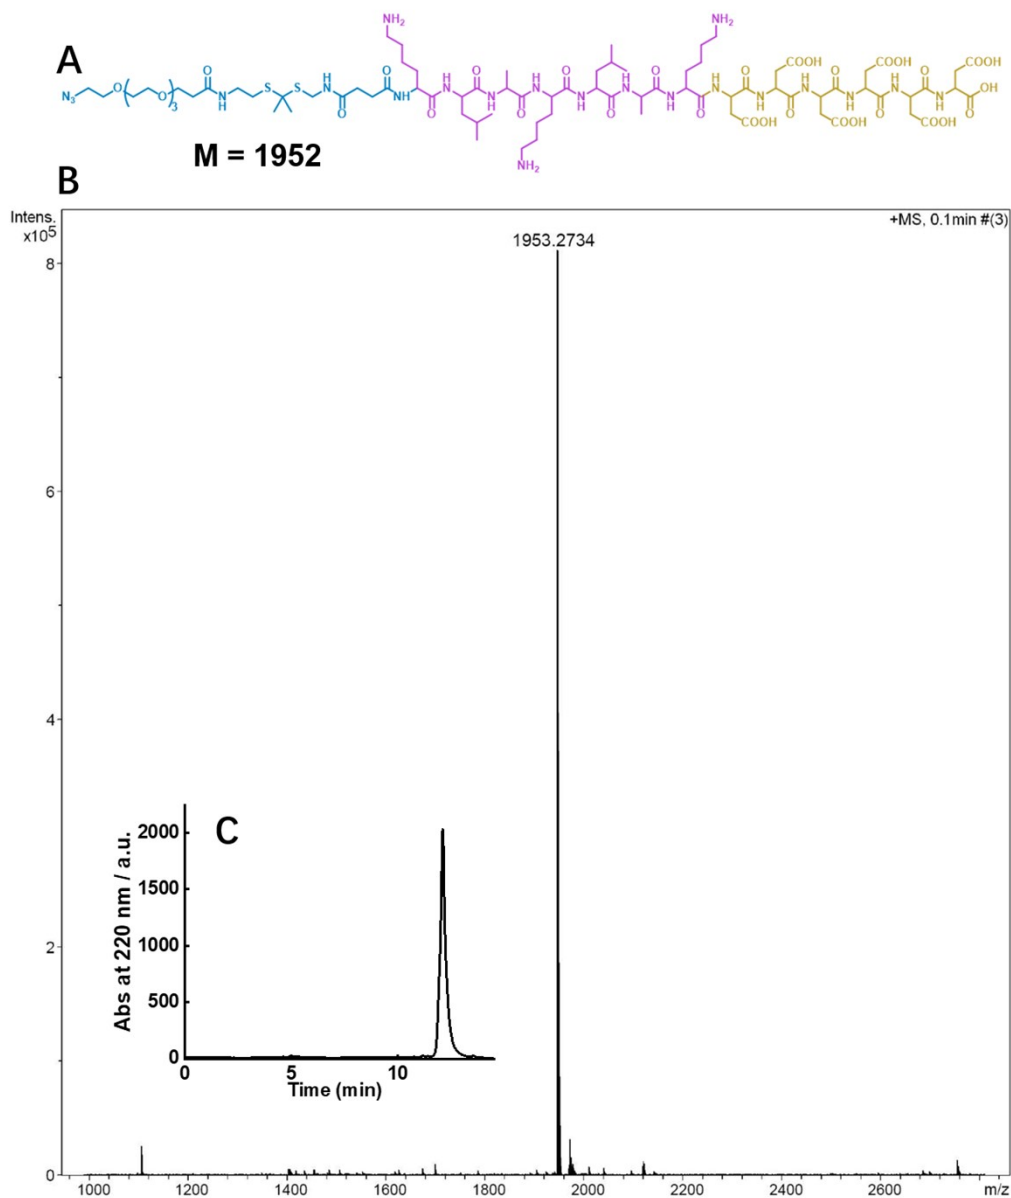

Figure S1. (A) The chemical structure of RAB peptide. (B) The ESI-MS spectrum of RAB peptide. (C) The HPLC spectrum of RAB peptide. (purity= 97.9%)

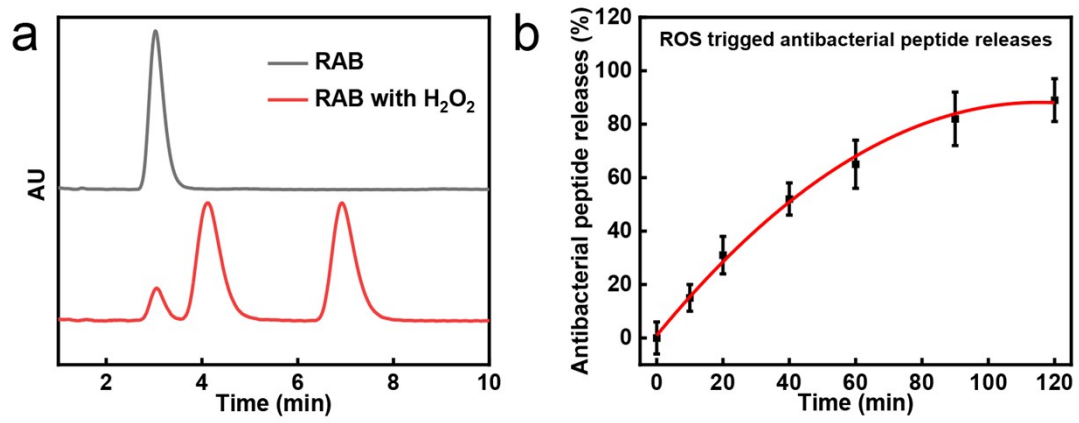

Figure S2. (a) The HPLC results of RAB and RAB with 90 min H<sub>2</sub>O<sub>2</sub>. (b) The release curve of antibacterial peptide after RAB with different time H<sub>2</sub>O<sub>2</sub>.

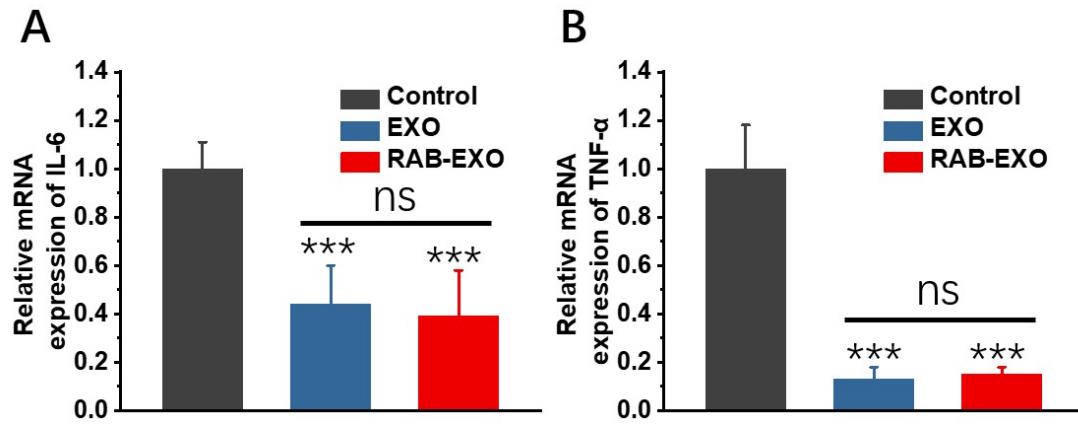

Figure S3. qRT-PCR analysis of M1-related genes A) IL-6 and B) TNF- $\alpha$ . ns: no significant difference. \* $p < 0.05$ , \*\* $p < 0.01$ , and \*\*\* $p < 0.001$ .

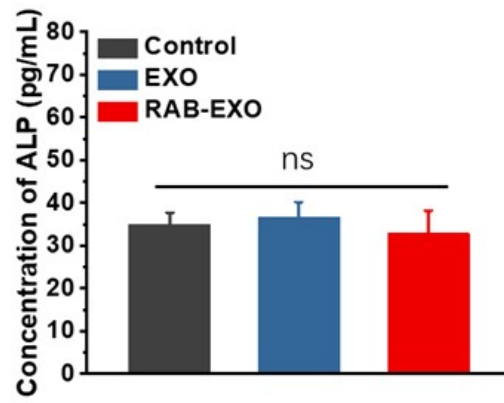

Figure S4. The concentration of ALP of MG-63 cells after being treated by EXO and RAB-EXO.

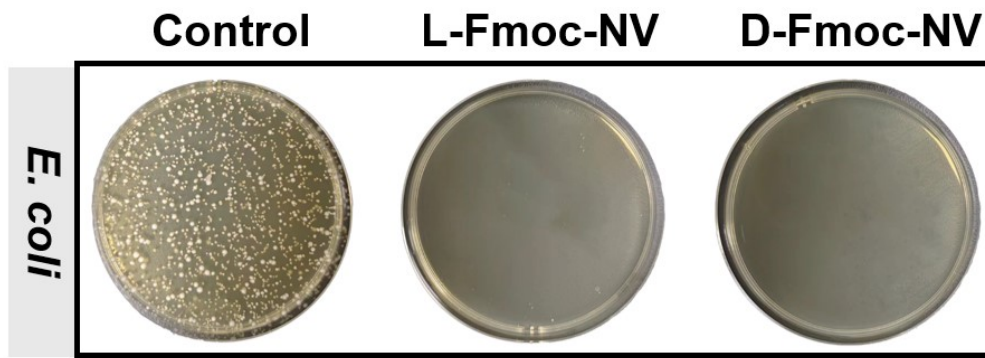

Figure S5. Antibacterial properties of RAB-EXO against to *S. aureus* via bacterial colony assay.

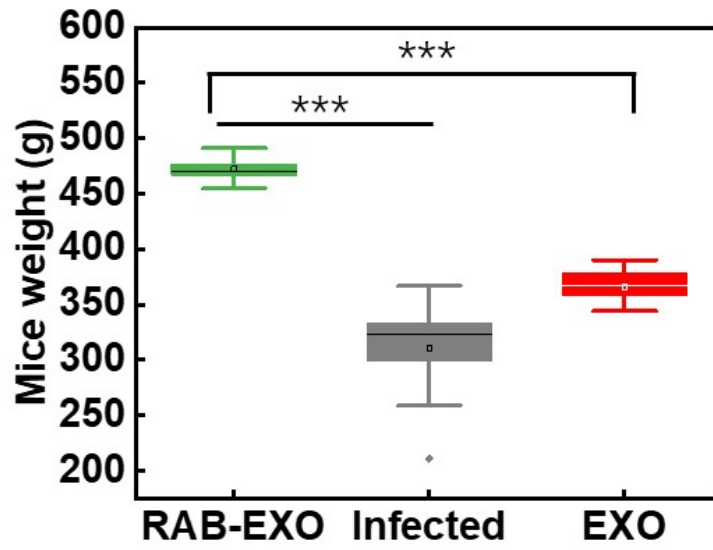

Figure S6. The weight of mice after different treatment on day 14.

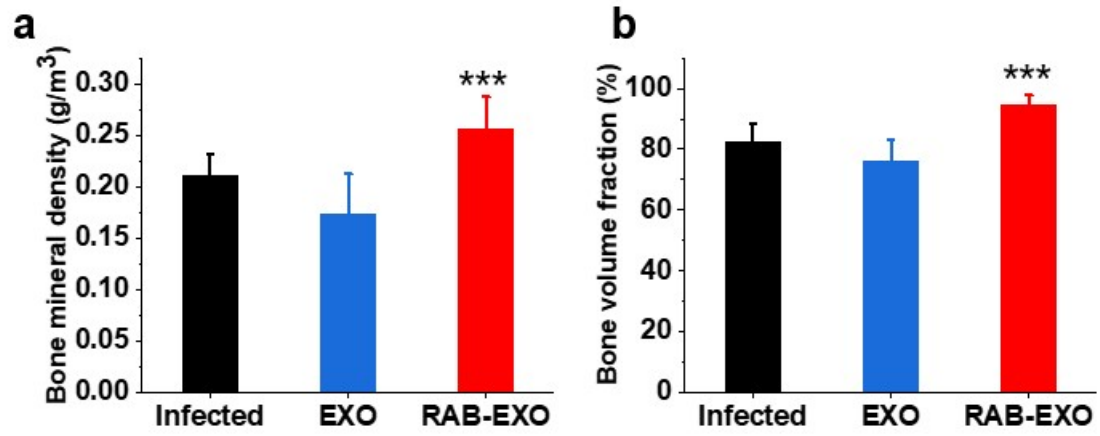

Figure S7. (a) The bone mineral density of Infected, EXO and RAB-EXO group. (b) The bone volume fraction of Infected, EXO and RAB-EXO group.



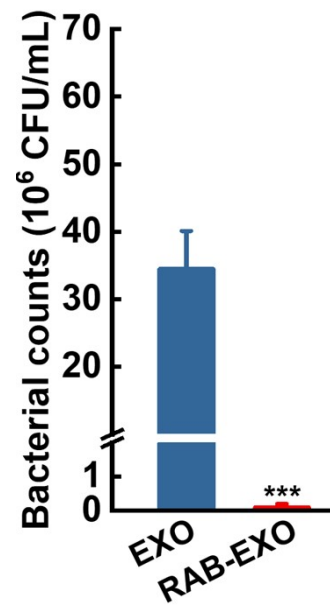

Figure S8. *In vivo* antibacterial properties of RAB-EXO via bacterial colony assay.

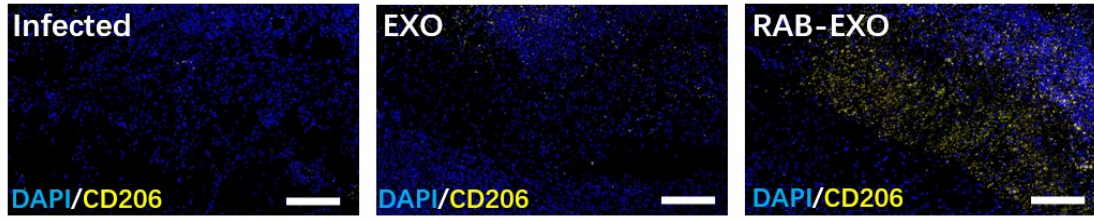

Figure S9. The Immunofluorescence staining (blue: DAPI; yellow: CD206) of bone tissue of Infected, EXO, and RAB-EXO group. Scale bar = 100  $\mu$ m.
